# Supplementary material
Source: HighWire-hosted journal article supplement (https://ebmtp.com/highwire/filestream/161064/field_highwire_adjunct_files/0/nash_842.pdf)
Supplement: nash_842.pdf [file nash_842.pdf]

# 再発寛解型多発性硬化症に対する 高用量免疫抑制療法および自家造血細胞移植

## High-dose immunosuppressive therapy and autologous HCT for relapsing-remitting MS

Richard A. Nash, MD\*;  
George J. Hutton, MD;  
Michael K. Racke, MD;  
Uday Popat, MD;  
Steven M. Devine, MD;  
Kaitlyn C. Steinmiller, MS;  
Linda M. Griffith, MD,  
MHS, PhD;  
Paolo A. Muraro, MD, PhD;  
Harry Openshaw, MD;  
Peter H. Sayre, MD;  
Olaf Stuve, MD, PhD;  
Douglas L. Arnold, MD;  
Mark H. Wener, MD;  
George E. Georges, MD;  
Annette Wundes, MD;  
George H. Kraft, MD;  
James D. Bowen, MD

\*Colorado Blood Cancer

Correspondence to  
Dr. Nash:  
richard.nash@healthonecares.com

**目的：**高用量免疫抑制療法 (HDIT) および自家造血細胞移植 (HCT) による多発性硬化症 (MS) の疾患安定化について、安全性、有効性および持続性を評価する。

**方法：**High-Dose Immunosuppression and Autologous Transplantation for Multiple Sclerosis (HALT-MS) は、MSの疾患修飾療法中に身体障害の進行 [総合障害度評価尺度 (EDSS) 3.0~5.5] を伴う再発を経験した再発寛解 (RR) 型MS患者を対象とした、HDIT/HCTの第II相臨床試験である。主要評価項目は無イベント生存率 (EFS) であり、身体障害の進行、再発またはMRI上の新病巣による疾患活動がみられない生存率と定義した。被験者を移植後5年間にわたり評価した。毒性の報告には米国国立癌研究所の有害事象 (AE) 共通用語規準を用いた。

**結果：**被験者25例が移植のための評価を受け、24例がHDIT/HCTを受けた。追跡調査期間の中央値は62ヵ月 (範囲：12~72ヵ月) であった。EFSは69.2% [90%信頼区間 (CI) : 50.2~82.1] であった。無増悪生存率、臨床的無再発生存率、MRI無活動性生存率はそれぞれ91.3% (90% CI : 74.7~97.2%), 86.9% (90% CI : 69.5~94.7%), 86.3% (90% CI : 68.1~94.5%) であった。HDIT/HCTによるAEは予想される毒性と一致し、遠隔期の重大な神経学的有害作用も認められなかった。死亡せずに本試験を完了した被験者では、神経学的身体障害の改善がみられ、EDSSの変化の中央値は-0.5 (四分位範囲：-1.5~0.0,  $p = 0.001$ ) であった。

**結論：**維持療法を行わないHDIT/HCTは、活動性RR型MSの長期間持続する寛解の導入に対し、5年後の時点で有効であった。

**ClinicalTrials.gov識別子：** NCT00288626

**エビデンスの分類：**本研究は、RR型MSの被験者で持続的な寛解がみられ、毒性はHDIT/HCTから予想されるものであったという、クラスIVのエビデンスを提供する。

Neurology® 2017; 88: 842-852

図1 各患者の移植前の特性と転帰

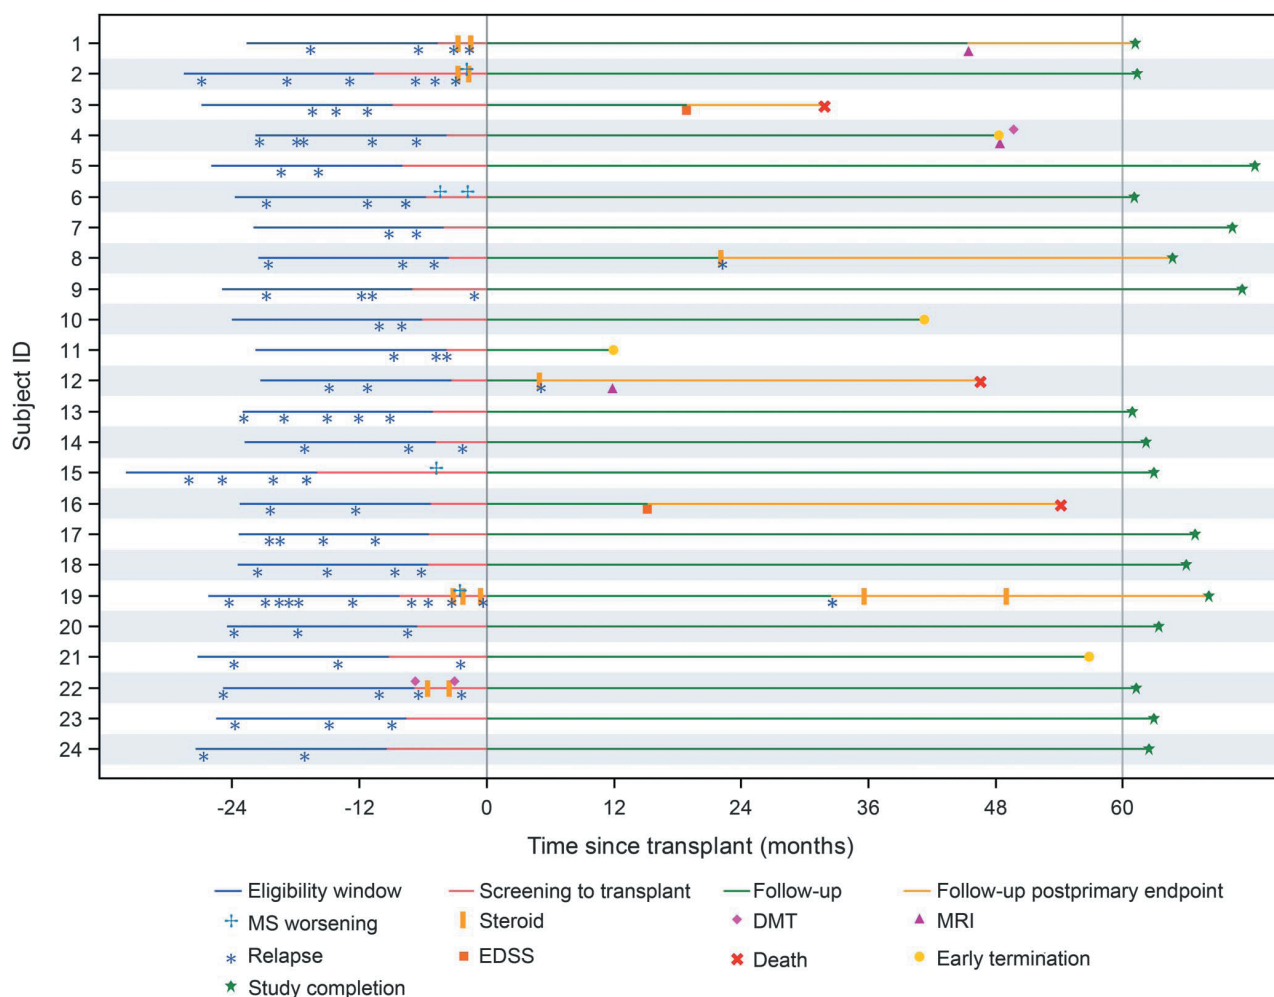

各患者の移植前の特性と本試験期間中の転帰を、移植を受けた24例について示す。時間は、移植細胞の注入日を第0日とし、月単位で示す。適格性判断期間 (eligibility window) は、スクリーニング来院の18ヵ月前を起点として定義した。スクリーニングでは、適格性を判断するため、治験実施計画書に定義した再発が、適格性判断期間中に何回起こったかを後向きに特定し、臨床データベースに記録した。スクリーニングから移植までの期間、治験実施計画書に基づく適格性を判断した時点から第0日までの期間と定義した。スクリーニングから第0日までの期間に起こったイベントをより完全に把握するため、多発性硬化症 (MS) の増悪・再発の報告を後向きに検討し、治験実施計画書の定義に基づく再発があったか、またはイベントが再発より重症度の低い増悪であったかを判断した。MSの増悪とは、新しい神経学的徴候または症状が出現したが、再発の基準は満たさないものであり、スクリーニングから第0日までの期間にのみ記録された。患者2、6、14、15、19および22では、スクリーニングから移植までの期間に総合障害度評価尺度 (EDSS) が0.5以上増加した。一部の被験者では、来院スケジュールの都合から、本試験完了が5年後時点における28日間の来院期間 (visit window) を過ぎてしまった。被験者のフローチャートは補遺のFigure e-1に示している。計18例の被験者が4年後時点の評価を完了し、17例が5年後時点の評価を完了した。被験者のMSの疾患活動性は、治療前との比較において、移植後に低下した。DMT = 疾患修飾療法。
